# Supplementary material for: Photo-reduction of metallic ions doped in patterned polymer films for the fabrication of plasmonic photonic crystals
Source: Royal Society of Chemistry journal article supplement (doi:10.1039/c5tc00945f), 2015-01-01
Supplement: c5tc00945f1.pdf [file c5tc00945f1.pdf]

## Supplementary information

---

# Photo-reduction of metallic ions doped in patterned polymer films for the fabrication of plasmonic photonic crystals

Yuanhai Lin,<sup>1</sup> Xinping Zhang,<sup>1\*</sup> Shi Bai,<sup>2</sup> and Anming Hu<sup>2,3</sup>

<sup>1</sup>*Institute of Information Photonics Technology and College of Applied Sciences, Beijing University of Technology, Beijing 100124, P. R. China*

<sup>2</sup>*Institute of Laser Engineering, Beijing University of Technology, Beijing 100124, P. R. China*

<sup>3</sup>*Department of Mechanical, Aerospace and Biomedical Engineering, University of Tennessee Knoxville, Knoxville TN 37996, USA*

Corresponding author: [zhangxinping@bjut.edu.cn](mailto:zhangxinping@bjut.edu.cn)

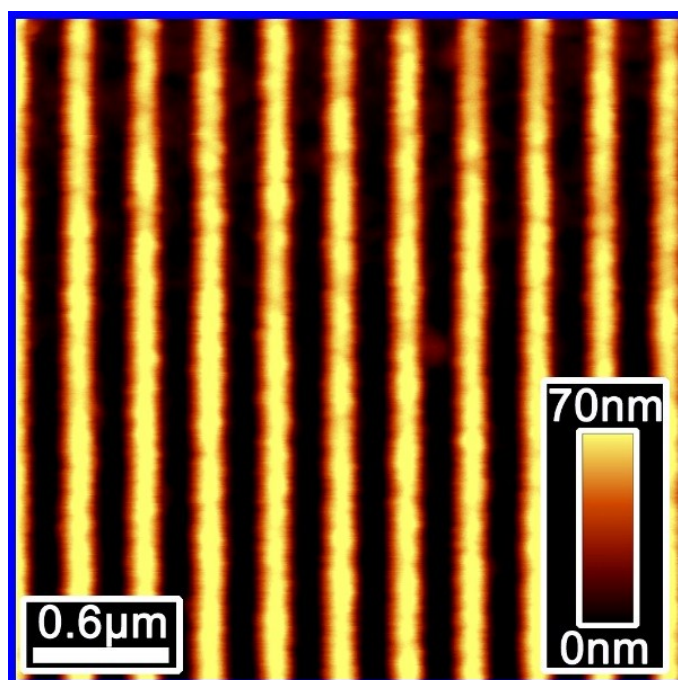

Fig. S1. The atomic force microscopic (AFM) image measured on the plasmonic grating structures consisting of continuous silver nanolines after annealing at 280 °C.

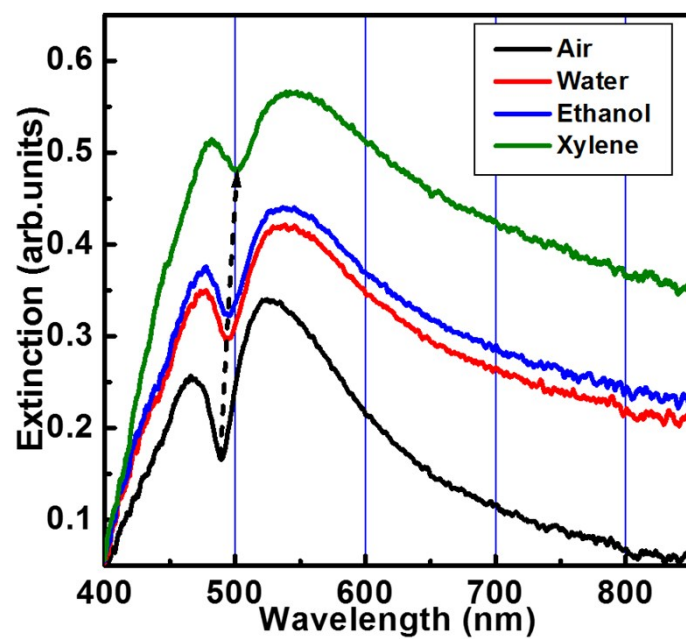

Fig. S2. The optical extinction spectra used as sensor signals measured on three different kinds of liquids: water, ethanol, and xylene, denoted by the solid red, blue, and dark green curves, respectively, for normal incidence of light. The black curve is the optical extinction spectrum measured in air and plotted for comparison. The spectrum of the white-light source has been used as the blank for all of the measurements here. The dashed arrow indicates the shift of the Fano-coupling feature with changing the environmental medium.
